# Supplementary material for: Quantitative analysis of drug tablet aging by fast hyper-spectral stimulated Raman scattering microscopy
Source: Royal Society of Chemistry journal article supplement (doi:10.1039/d3an01527k), 2023-12-01
Supplement: d3an01527k1.pdf [file d3an01527k1.pdf]

## Supplementary Information

### Supplementary Figures

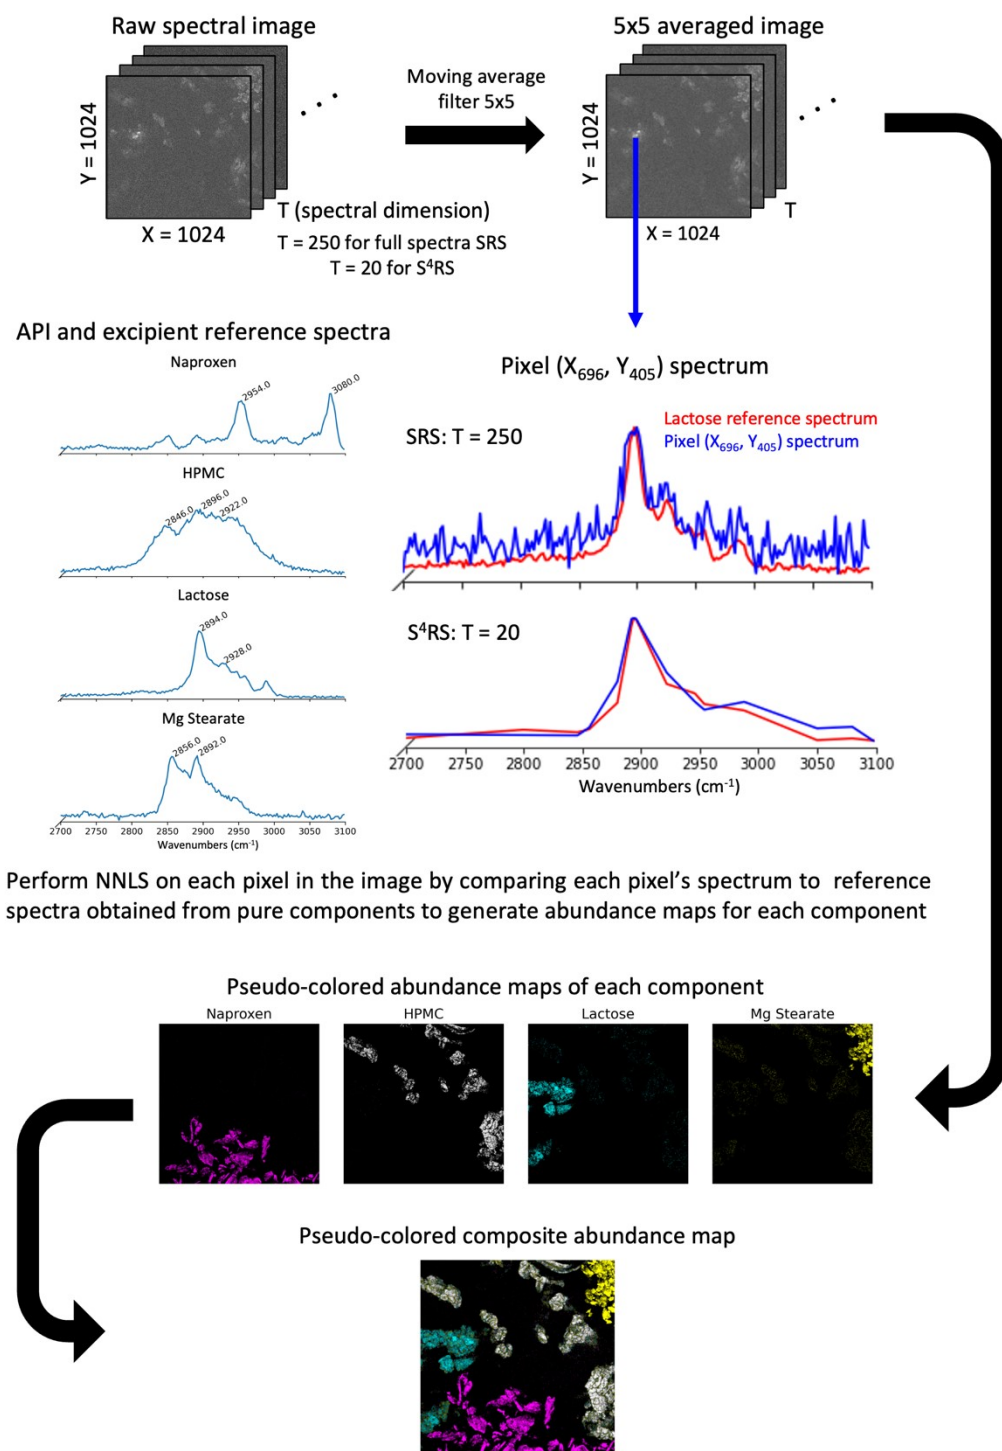

**Supplementary Figure 1:** Spectral unmixing methodology, demonstrated with a known spatial mix of API and excipient powders.

## Supplementary Tables

| Raman Band (cm <sup>-1</sup> ) | Probable molecular assignment                                                           |
|--------------------------------|-----------------------------------------------------------------------------------------|
| 1350                           | background                                                                              |
| 1360                           | background                                                                              |
| 1394                           | naproxen CH <sub>3</sub> bending                                                        |
| 1420                           | background                                                                              |
| 1440                           | background                                                                              |
| 2700                           | background                                                                              |
| 2800                           | background                                                                              |
| 2846                           | HPMC CH <sub>2</sub> asymmetric stretching                                              |
| 2856                           | Mgst CH <sub>2</sub> stretching                                                         |
| 2880                           | HPMC CH stretching                                                                      |
| 2892                           | lactose CH <sub>2</sub> stretching, HPMC CH stretching, Mgst CH <sub>3</sub> stretching |
| 2894                           | lactose CH <sub>2</sub> stretching, HPMC CH stretching, Mgst CH <sub>3</sub> stretching |
| 2896                           | lactose CH <sub>2</sub> stretching, HPMC CH stretching, Mgst CH <sub>3</sub> stretching |
| 2922                           | lactose CH stretching, HPMC CH <sub>2</sub> symmetric stretching                        |
| 2946                           | naproxen CH <sub>3</sub> stretching, HPMC CH <sub>2</sub> symmetric stretching          |
| 2954                           | naproxen CH <sub>3</sub> stretching, HPMC CH <sub>2</sub> symmetric stretching          |
| 2988                           | lactose CH stretching                                                                   |
| 3050                           | background                                                                              |
| 3080                           | naproxen aromatic CH stretching                                                         |
| 3098                           | background                                                                              |

**Supplementary Table 1:** Probable molecular structure assignments for each of 20 manually selected sparse wavenumbers.
